# Supplementary material for: Distinct receptor binding domain IgG thresholds predict protective host immunity across SARS-CoV-2 variants and time
Source: PubMed Central journal article supplement (PMC10622572; doi:10.1038/s41467-023-42717-1), 2023-11-02
Supplement: 41467_2023_42717_MOESM1_ESM.pdf [file 41467_2023_42717_MOESM1_ESM.pdf]

## Supplementary Information

The All Ireland Infectious Diseases Cohort Study Investigators:

Mater Misericordiae University Hospital: A. Cotter, E. Muldoon, G. Sheehan, T. McGinty, JS.

Lambert, S. Green, K. Leamy. St Vincent's University Hospital: G. Kenny, K. McCann, R.

McCann, C. O'Broin, S. Waqas, S. Savinelli, E. Feeney, PWG. Mallon. CEPHR: A. Garcia Leon,

S. Miles, D. Alalwan, R. Negi. Beaumont Hospital: E. de Barra, S. McConkey, K. Hurley, I.

Sulaiman. University College Cork: M. Horgan, C. Sadlier, J. Eustace. University College

Dublin: C. Kelly, T. Bracken. Sligo University Hospital: B. Whelan, Our Lady of Lourdes

Hospital: J Low. Wexford General Hospital: O Yousif. University Hospital Galway: B.

McNicholas. St Luke's Hospital Kilkenny: G. Courtney. Children's Health Ireland: P. Gavin.

VACCELERATE - EU-COVAT-1 Part A Study Group:

University of Cologne: Julia M. Neuhann, Jannik Stemler, Ullrich Bethe, Sarah Heringer. Jon

Salmanton-García, Lea Tischmann, Arnd Cüppers, Jan Grothe, Philipp Koehler, Oliver A.

Cornely. Hospital La Paz: Antonio J. Carcas, Jesús Frías-Iniesta. Hacettepe University School

of Medicine: Murat Akova, CEPHR: Alejandro Garcia Leon, Patrick Mallon, Riya Negi, Colette

Gaillard, Gurvin Saini. University of Antwerp: Christine Lammens, An Hotterbeekx, Katherine

Loens, Surbhi Malhotra-Kumar, Herman Goossens, Samir Kumar-Singh, Franz König, Lusine

Yeghiazaryan, Martin Posch.

## Supplementary Figure 1 – Flow Cytometry Gating Strategy for Neutralisation Assay

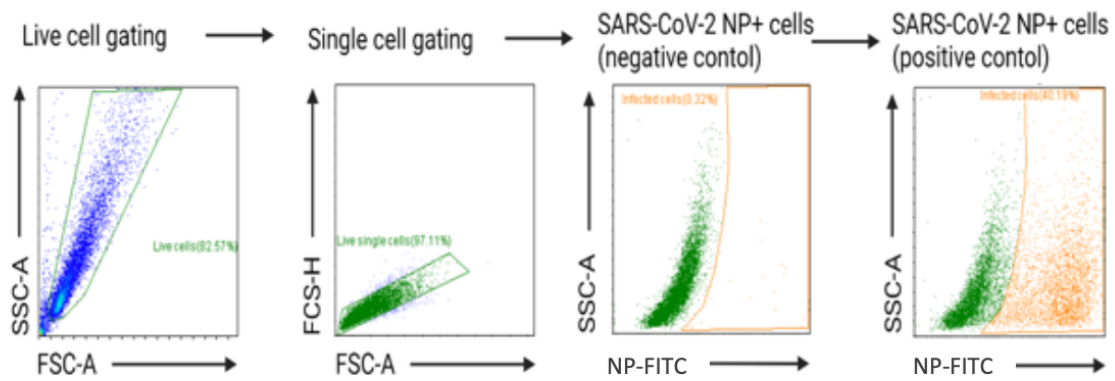

Cells were gated against Forward (FSC) and Side-Scatter (SSC) to exclude debris from intact cells, then single cells were gated based on linearity between Area (A) and Height (H). Infected cells (NP+) were gated against the negative controls (Infection Medium alone). Analysis was performed using CytExpert software (version 2.4.0.28, Beckman Coulter).

Supplementary Figure 2 – Gating Strategy for SARS-CoV-2 specific T cell response

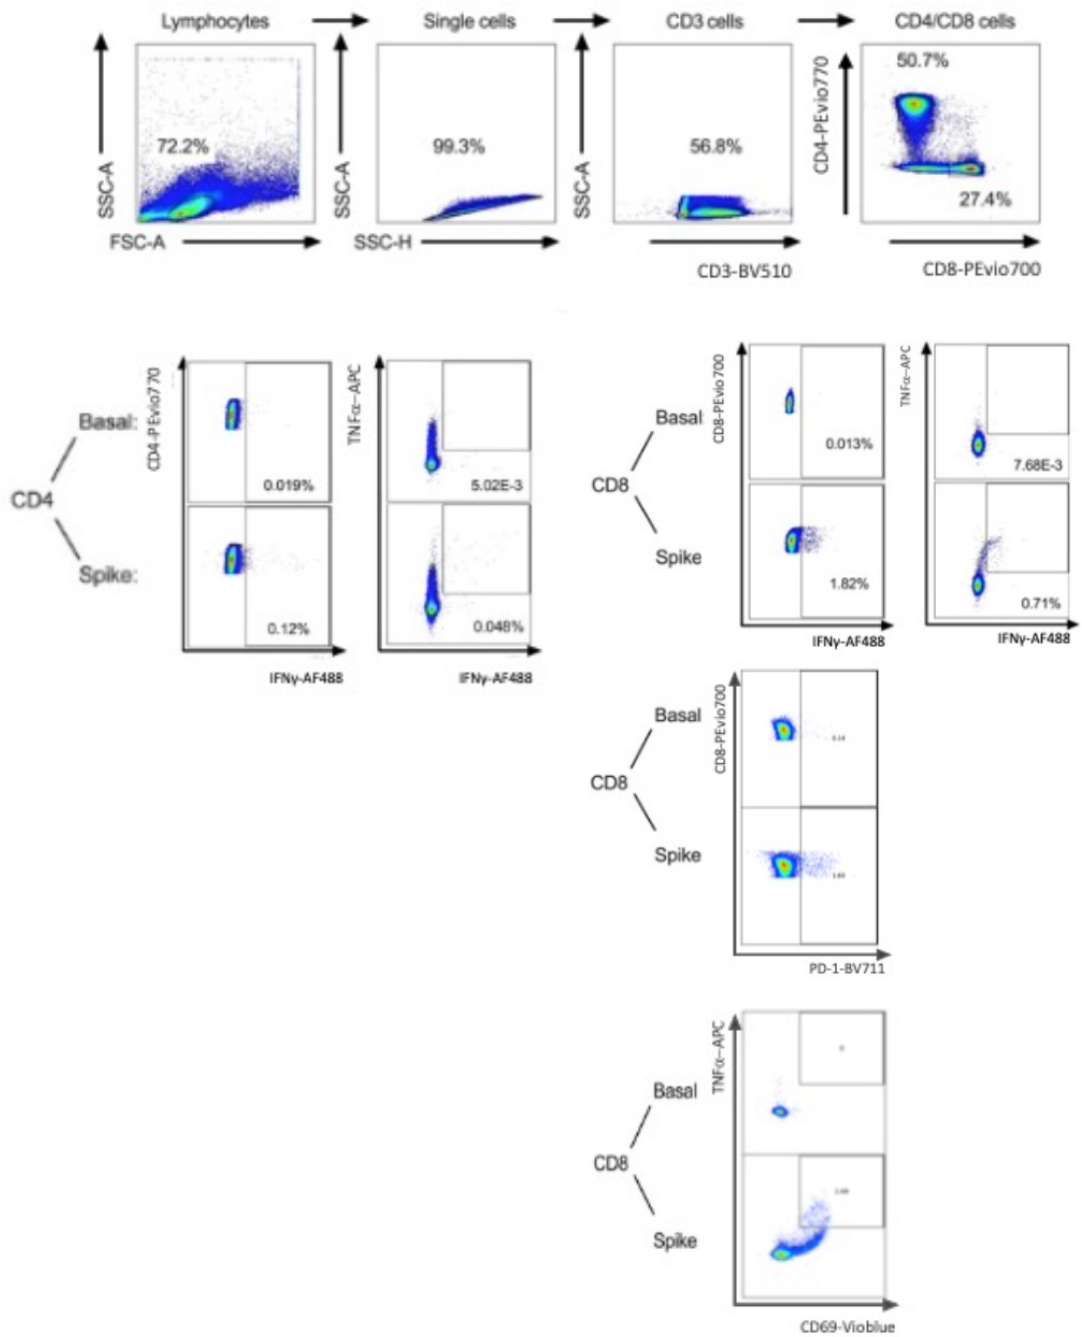

Representative flow cytometry gating strategy for detection of IFN $\gamma$ + and TNF $\alpha$ + responses in CD4+ and CD8+ T cells, and PD-1+ and CD69+ TNF $\alpha$ + CD8+ T cells. Basal represents the unstimulated control.

**Supplementary Figure 3 – Correlation between RBD and NT50 in the VACCELERATE EU-COVAT-1 AGED Part A Cohort**

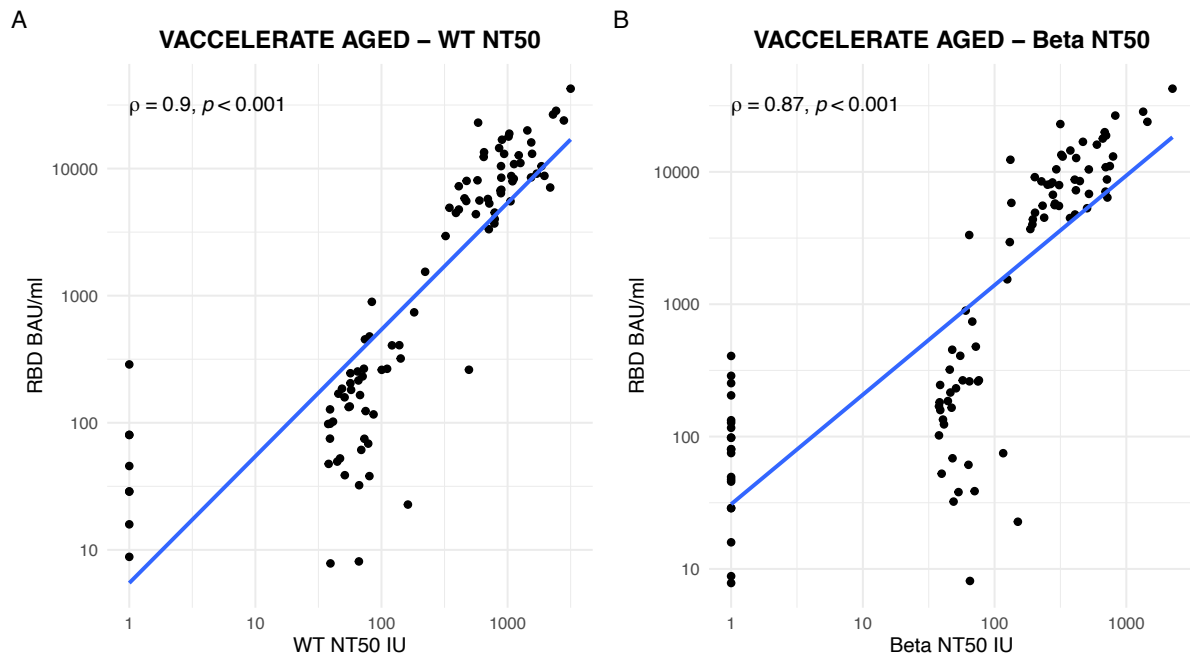

Legend: Two tailed Spearman correlation between A) RBD and WT-B.1.177.18 (exact p value <2.2e-16) NT50 B) RBD and Beta NT50 (exact p value <2.2e-16)

**Supplemental Table 1** – Two tailed Spearman correlation of all antigens with WT-B neutralising capacity in all samples and >30 days from symptom onset only

|     | All samples |          | >30 days from symptom onset |          |
|-----|-------------|----------|-----------------------------|----------|
|     | rho         | P value  | rho                         | P value  |
| RBD | 0.81        | <2.2e-16 | 0.85                        | <2.2e-16 |
| S1  | 0.80        | <2.2e-16 | 0.84                        | <2.2e-16 |
| S2  | 0.72        | <2.2e-16 | 0.76                        | <2.2e-16 |
| N   | 0.74        | <2.2e-16 | 0.72                        | <2.2e-16 |

**Supplemental Table 2** – Sensitivity and specificity of each antigen in predicting a WT-B NT50 of <1000 IU in all samples and in >30 days from symptom onset

|     | All samples          |                      | >30 days from symptom onset |                      |
|-----|----------------------|----------------------|-----------------------------|----------------------|
|     | Sensitivity (95% CI) | Specificity (95% CI) | Sensitivity (95% CI)        | Specificity (95% CI) |
| RBD | 83% (76-89%)         | 73% (56-87%)         | 82% (74-88%)                | 80% (56-94%)         |
| S1  | 87% (80-91%)         | 59% (41-75%)         | 87% (79-92%)                | 58% (33-80%)         |
| S2  | 72% (65-79%)         | 65% (46-80%)         | 72% (63-79%)                | 74% (49-91%)         |
| N   | 68% (61-76%)         | 85% (69-95%)         | 67% (58-75%)                | 100% (82-100%)       |

**Supplemental Table 3** – Two tailed Spearman correlation between WT-B NT50 and spike specific T cell responses

| Spike specific response            | Spearman rho | P value |
|------------------------------------|--------------|---------|
| CD4+ IFN $\gamma$ +                | 0.21         | 0.24    |
| CD4+ TNF $\alpha$ + IFN $\gamma$ + | -0.02        | 0.92    |
| CD4+ PD-1+                         | 0.03         | 0.86    |
| CD8+ IFN $\gamma$ +                | 0.09         | 0.61    |
| CD8+ TNF $\alpha$ + IFN $\gamma$ + | 0.08         | 0.66    |
| CD8+ CD69+ TNF $\alpha$ +          | 0.27         | 0.13    |

**Supplemental Table 4** – Spike specific responses in those with an RBD IgG above or below 456 BAU/ml

| <b>Spike specific response</b>                              | <b>&gt;456 BAU/ml</b> | <b>&lt;456 BAU/ml</b> | <b>P value</b> |
|-------------------------------------------------------------|-----------------------|-----------------------|----------------|
| <b>CD4+ IFN<math>\gamma</math>+</b>                         | 0.065 (0.02-0.1)      | 0.06 (0.00009-0.07)   | 0.68           |
| <b>CD4+ TNF<math>\alpha</math>+ IFN<math>\gamma</math>+</b> | 0.02 (0.002-0.03)     | 0.01 (0.005-0.03)     | 0.78           |
| <b>CD4+ PD-1+</b>                                           | 0.26 (0.14-0.35)      | 0.21 (0.09-0.36)      | 0.68           |
| <b>CD8+ IFN<math>\gamma</math>+</b>                         | 0.31 (0.23-0.99)      | 0.23 (0.0-0.34)       | 0.13           |
| <b>CD8+ TNF<math>\alpha</math>+ IFN<math>\gamma</math>+</b> | 0.15 (0.12-0.86)      | 0.12 (0.06-0.17)      | 0.12           |
| <b>CD8+ CD69+ TNF<math>\alpha</math>+</b>                   | 0.09 (0.04-0.31)      | 0.03 (0.01-0.099)     | 0.06           |

Columns show median and interquartile range of the percentage of spike specific cells for each set of T cell markers. Groups are compared with Kruskal-Wallis rank sum test.
